# Supplementary material
Source: PubMed Central journal article supplement (PMC6872939)
Supplement: NIHMS1540838-supplement-Sup_Tab1-9.pdf [file NIHMS1540838-supplement-Sup_Tab1-9.pdf]

**Supplementary Table 1:** Demographic and laboratory results of controls and patients with alcohol use disorder or alcoholic hepatitis

| <b>Variables</b>                           | <b>Controls<br/>(n=26)</b> | <b>Alcohol use disorder<br/>(n=44)</b> | <b>Alcoholic hepatitis<br/>(n=88)</b> |
|--------------------------------------------|----------------------------|----------------------------------------|---------------------------------------|
| Sex (% male), n (%), n=158                 | 16 (61.5)                  | 37 (84.1)                              | 60 (68.2)                             |
| Age (years), n=158                         | 48.5 (27.0-74.0)           | 44.0 (27.0-67.0)                       | 50.0 (30.0-75.0)                      |
| BMI (kg/m <sup>2</sup> ), n=132            | 26.0 (18.8-35.6)           | 24.3 (17.9-37.0)                       | 27.2 (16.3-48.3)                      |
| Creatinine (mg/dL), n=128                  |                            | 0.8 (0.5-1.3)                          | 0.8 (0.3-8.1)                         |
| Bilirubin (mg/dL), n=130                   |                            | 0.5 (0.2-6.4)                          | 15.6 (2.5-38.6)                       |
| AST (IU/L), n=132                          |                            | 47.5 (15.0-283.0)                      | 132.0 (38.0-456.0)                    |
| ALT (IU/L), n=132                          |                            | 37.5 (9.0-184.0)                       | 45.0 (15.0-216.0)                     |
| Albumin (g/dL), n=124                      |                            | 4.4 (2.2-5.2)                          | 2.4 (1.3-4.1)                         |
| INR, n=128                                 |                            | 1.0 (0.8-2.0)                          | 1.8 (1.0-4.4)                         |
| GGT (IU/L), n=83                           |                            | 111.5 (16.0-1131.0)                    | 196.0 (33.0-3632.0)                   |
| Platelet count (10 <sup>9</sup> /L), n=122 |                            | 221.0 (21.0-434.0)                     | 127.0 (13.0-447.0)                    |
| MELD, n=87                                 |                            |                                        | 24.0 (12.0-46.0)                      |
| FIB-4, n=122                               |                            | 1.6 (0.4-21.4)                         | 7.8 (0.7-73.4)                        |
| FIB-4 > 3.25 (F3-F4), n (%)                |                            | 8 (21.1)                               | 75 (89.3)                             |
| Prior length of alcohol abuse,<br>n=111    |                            |                                        |                                       |
| 1-5 years, n (%)                           |                            | 4 (12.9)                               | 16 (20.0)                             |
| 5-10 years, n (%)                          |                            | 13 (41.9)                              | 16 (20.0)                             |
| >10 years, n (%)                           |                            | 14 (45.2)                              | 48 (60.0)                             |

Values are presented as median with range in brackets for continuous variables or number and percentage in brackets for categorical variables. Percentages are calculated based on the actual number of patients in each group where the respective data was available. The number of subjects for which the respective data was available is indicated in the first column.

BMI, body mass index; AST, aspartate aminotransferase; ALT, alanine aminotransferase; INR, international normalized ratio; GGT, gamma-glutamyl transferase; MELD, model for end-stage liver disease; FIB-4, fibrosis-4 index

**Supplementary Table 2:** Characteristics of patients with alcoholic hepatitis patients (n=82) for cytolysin analysis

| <b>Treatment at admission</b>          |                                                     |
|----------------------------------------|-----------------------------------------------------|
| Steroids, n (%), n=80                  | 30 (37.5)                                           |
| Pentoxifylline, n (%), n=70            | 7 (10.0)                                            |
| Antibiotics, n (%), n=80               | 40 (50.0)                                           |
| Proton pump inhibitors, n (%), n=42    | 2 (4.7)                                             |
| <b>Clinical characteristics</b>        |                                                     |
| Infections, n (%), n=66                | 16 (24.2)                                           |
| Abstinent at day 30, n=46              |                                                     |
| Abstinent, n (%)                       | 39 (84.8)                                           |
| Reduced alcohol consumption, n (%)     | 4 (8.7)                                             |
| Continued alcohol abuse, n (%)         | 3 (6.5)                                             |
| Abstinent at day 90, n=30              |                                                     |
| Abstinent, n (%)                       | 27 (90.0)                                           |
| Reduced alcohol consumption, n (%)     | 2 (6.7)                                             |
| Continued alcohol abuse, n (%)         | 1 (3.3)                                             |
| Liver biopsy available, n (%), n=82    | 49 (59.8)                                           |
| Stage of Fibrosis, n (%), n=48         | 0 / 1 / 2 / 3 / 4                                   |
|                                        | 2 (4.1) / 0 (0.0) / 8 (16.7) / 8 (16.7) / 30 (62.5) |
| <b>Clinical scores and outcome</b>     |                                                     |
| MELD, median (range), n=81             | 24.0 (12.0–46.0)                                    |
| MELD > 21, n (%)                       | 61 (75.3)                                           |
| Child-Pugh stage, n (%), n=80          | A / B / C                                           |
|                                        | 1 (1.3) / 24 (30.0) / 55 (68.8)                     |
| Maddrey's DF, median (range), n=66     | 68.0 (3.0-246.0)                                    |
| Maddrey's DF > 32, n (%)               | 60 (90.9)                                           |
| ABIC, median (range), n=82             | 6.7 (4.0-9.5)                                       |
| 30 day mortality rate, n (%), n=76     | 8 (10.5)                                            |
| 90 day mortality rate, n (%), n=57     | 14 (24.6)                                           |
| <b>Causes of death within 180 days</b> |                                                     |
| Liver failure*                         | 12                                                  |
| Gastrointestinal bleeding              | 3                                                   |
| Septic shock                           | 2                                                   |
| Unknown                                | 3                                                   |

\*One patient underwent liver transplantation.

Antibiotics include prophylactic antibiotics. Four patients with infections were not treated with antibiotics at the time of enrollment. Values are presented as median (range) for continuous variables or number (percentage) for categorical variables. Percentages are calculated based on the actual number of patients in each group where the respective data was available. The number of subjects for which the respective data was available is indicated in the first column.

MELD, model for end-stage liver disease; DF, discriminant function; ABIC, Age, serum bilirubin, INR, and serum creatinine score

**Supplementary Table 3:** Univariate logistic regression analysis of laboratory and clinical parameters associated with cytolyisin, and Cox regression analysis assessing the association between cytolyisin and survival in alcoholic hepatitis patients

| <b>Univariate logistic regression*</b> | <b>OR</b> | <b>95% CI</b>  | <b>P value<sup>†</sup></b> |
|----------------------------------------|-----------|----------------|----------------------------|
| Steroids                               | 2.42      | 0.92-6.50      | 0.074                      |
| PTX                                    | 3.09      | 0.62-16.97     | 0.165                      |
| Antibiotics                            | 1.80      | 0.70-4.81      | 0.230                      |
| Infections                             | 1.90      | 0.55-6.29      | 0.295                      |
| Cirrhosis                              | 2.33      | 0.65-9.79      | 0.212                      |
| Abstinence day 30 follow-up            | 1.55      | 0.22-31.43     | 0.704                      |
| Creatinine                             | 2.17      | 1.28-4.78      | <b>0.019</b>               |
| GGT                                    | 0.99      | 0.98-1.00      | 0.058                      |
| INR                                    | 2.35      | 1.07-5.66      | <b>0.040</b>               |
| Platelet count                         | 0.99      | 0.98-1.00      | <b>0.012</b>               |
| MELD                                   | 1.18      | 1.08-1.31      | <b>6.51e-04</b>            |
| MELDNa                                 | 1.20      | 1.09-1.35      | <b>9.21e-04</b>            |
| Maddrey's DF > 32                      | 50.52     | 0.23-134999.59 | 1.000                      |
| Maddrey's DF                           | 1.01      | 1.00-1.02      | 0.090                      |
| ABIC                                   | 1.68      | 1.13-2.62      | <b>0.014</b>               |

  

| <b>Univariate Cox regression*</b> | <b>HR</b> | <b>95% CI</b> | <b>P value<sup>†</sup></b> |
|-----------------------------------|-----------|---------------|----------------------------|
| 30 day mortality                  | 7.46      | 1.50-36.99    | <b>0.014</b>               |
| 90 day mortality                  | 16.72     | 3.73-74.85    | <b>2.31e-04</b>            |
| 180 day mortality                 | 22.24     | 5.14-96.30    | <b>3.35e-05</b>            |

  

| <b>Multivariate Cox regression<sup>‡</sup></b> | <b>HR</b> | <b>95% CI</b> | <b>P value<sup>†</sup></b> |
|------------------------------------------------|-----------|---------------|----------------------------|
| Cytolyisin                                     | 14.07     | 2.83-69.85    | <b>0.001</b>               |
| MELD                                           | 1.09      | 1.01-1.16     | <b>0.022</b>               |

\*For Univariate logistic and Cox regression, n=82.

<sup>†</sup>Significance is indicated in bold.

<sup>‡</sup>Hazard ratio (HR) for 180-day mortality (n=79 for cytolyisin; n=78 for MELD), based on multivariate Cox regression analysis, adjusted for geographic region of patient enrollment; treatment with antibiotics; and platelet count. HR for cytolyisin was additionally adjusted for creatinine, bilirubin and INR as components of the MELD score.

Antibiotics include prophylactic antibiotics. In the Cox regression, patients were censored at the time point they were last seen alive. *P* values were determined by two-sided Wald test.

OR, odds ratio; HR, hazard ratio; CI, confidence interval; PTX, pentoxifylline; GGT, gamma-glutamyl transferase; INR, international normalized ratio; MELD, model for end-stage liver disease; MELDNa, sodium MELD; DF, discriminant function; ABIC, Age, serum bilirubin, INR, and serum creatinine score

**Supplementary Table 4:** Univariate logistic regression of virulence genes and antimicrobial resistance genes of *E. faecalis* and clinical outcomes in alcoholic hepatitis patients (n=25)

| <b>Gelatinase (<i>gelE</i>)</b>      | <b>OR</b> | <b>95% CI</b> | <b>P value*</b> |
|--------------------------------------|-----------|---------------|-----------------|
| Infections                           | 2.83      | 0.76-14.57    | 0.133           |
| 90 day mortality rate                | 1.22      | 0.24-4.75     | 0.771           |
| ALT                                  | 0.99      | 0.97-1.02     | 0.545           |
| AST                                  | 1.00      | 0.98-1.01     | 0.558           |
| Platelet count                       | 1.00      | 0.99-1.02     | 0.484           |
| INR                                  | 3.02      | 0.33-39.85    | 0.347           |
| Bilirubin                            | 1.00      | 0.91-1.13     | 0.982           |
| MELD                                 | 1.09      | 0.93-1.34     | 0.325           |
| ABIC                                 | 0.65      | 0.26-1.41     | 0.291           |
| Maddrey's DF                         | 0.97      | 0.94-0.99     | <b>0.041</b>    |
| <b>Serine protease (<i>sprE</i>)</b> |           |               |                 |
| Infections                           | 1.41      | 0.28-5.44     | 0.617           |
| 90 day mortality rate                | 1.83      | 0.33-10.22    | 0.440           |
| ALT                                  | 0.99      | 0.96-1.01     | 0.277           |
| AST                                  | 0.99      | 0.98-1.00     | 0.232           |
| Platelet count                       | 1.00      | 0.99-1.02     | 0.782           |
| INR                                  | 4.25      | 0.37-82.85    | 0.275           |
| Bilirubin                            | 0.99      | 0.89-1.12     | 0.794           |
| MELD                                 | 1.09      | 0.91-1.36     | 0.367           |
| ABIC                                 | 0.55      | 0.19-1.32     | 0.212           |
| Maddrey's DF                         | 0.99      | 0.97-1.00     | 0.108           |
| <b>Hyaluronidase (<i>EF0818</i>)</b> |           |               |                 |
| Infections                           | 1.17      | 0.23-4.34     | 0.814           |
| 90 day mortality rate                | 3.67      | 1.05-19.45    | 0.062           |
| ALT                                  | 0.99      | 0.97-1.01     | 0.400           |
| AST                                  | 0.99      | 0.98-1.00     | 0.248           |
| Platelet count                       | 1.00      | 0.99-1.00     | 0.323           |
| INR                                  | 3.38      | 0.49-33.05    | 0.240           |
| Bilirubin                            | 1.03      | 0.94-1.14     | 0.592           |
| MELD                                 | 1.11      | 0.96-1.33     | 0.200           |
| ABIC                                 | 0.57      | 0.25-1.14     | 0.137           |
| Maddrey's DF                         | 1.00      | 0.98-1.01     | 0.659           |
| <b>Hyaluronidase (<i>EF3023</i>)</b> |           |               |                 |
| Infections                           | 2.00      | 0.56-9.97     | 0.301           |
| 90 day mortality rate                | 1.10      | 0.33-3.65     | 0.876           |
| ALT                                  | 1.00      | 0.98-1.02     | 0.945           |
| AST                                  | 1.00      | 0.99-1.01     | 0.467           |
| Platelet count                       | 1.00      | 0.99-1.01     | 0.637           |
| INR                                  | 2.59      | 0.43-20.22    | 0.319           |
| Bilirubin                            | 1.06      | 0.97-1.19     | 0.224           |
| MELD                                 | 1.08      | 0.94-1.26     | 0.299           |
| ABIC                                 | 0.76      | 0.38-1.43     | 0.402           |
| Maddrey's DF                         | 1.00      | 0.98-1.01     | 0.775           |

**Quorum sensing system regulator (*fsrA*)**

|                       |      |            |       |
|-----------------------|------|------------|-------|
| Infections            | 2.00 | 0.56-9.97  | 0.301 |
| 90 day mortality rate | 1.10 | 0.33-3.65  | 0.876 |
| ALT                   | 1.00 | 0.98-1.02  | 0.945 |
| AST                   | 1.00 | 0.99-1.01  | 0.467 |
| Platelet count        | 1.00 | 0.99-1.01  | 0.637 |
| INR                   | 2.59 | 0.43-20.22 | 0.319 |
| Bilirubin             | 1.06 | 0.97-1.19  | 0.224 |
| MELD                  | 1.08 | 0.94-1.26  | 0.299 |
| ABIC                  | 0.76 | 0.38-1.43  | 0.402 |
| Maddrey's DF          | 1.00 | 0.98-1.01  | 0.775 |

**Quorum sensing system regulator (*fsrB*)**

|                       |      |            |       |
|-----------------------|------|------------|-------|
| Infections            | 2.35 | 0.65-11.82 | 0.209 |
| 90 day mortality rate | 2.83 | 0.84-14.26 | 0.120 |
| ALT                   | 1.00 | 0.97-1.02  | 0.645 |
| AST                   | 1.00 | 0.99-1.01  | 0.497 |
| Platelet count        | 1.00 | 0.99-1.01  | 0.554 |
| INR                   | 2.95 | 0.46-25.79 | 0.277 |
| Bilirubin             | 1.04 | 0.95-1.15  | 0.462 |
| MELD                  | 1.12 | 0.97-1.34  | 0.171 |
| ABIC                  | 0.61 | 0.28-1.19  | 0.171 |
| Maddrey's DF          | 0.99 | 0.97-1.00  | 0.183 |

**Quorum sensing system regulator (*fsrC*)**

|                       |      |            |       |
|-----------------------|------|------------|-------|
| Infections            | 2.35 | 0.65-11.82 | 0.209 |
| 90 day mortality rate | 2.83 | 0.84-14.2  | 0.120 |
| ALT                   | 1.00 | 0.97-1.02  | 0.645 |
| AST                   | 1.00 | 0.99-1.01  | 0.497 |
| Platelet count        | 1.00 | 0.99-1.01  | 0.554 |
| INR                   | 2.95 | 0.46-25.79 | 0.277 |
| Bilirubin             | 1.04 | 0.95-1.15  | 0.462 |
| MELD                  | 1.12 | 0.97-1.34  | 0.171 |
| ABIC                  | 0.61 | 0.28-1.19  | 0.171 |
| Maddrey's DF          | 0.99 | 0.97-1.00  | 0.183 |

**Adhesin (*ace*)**

|                       |      |            |       |
|-----------------------|------|------------|-------|
| Infections            | 1.32 | 0.37-6.53  | 0.674 |
| 90 day mortality rate | 0.76 | 0.22-2.52  | 0.635 |
| ALT                   | 1.01 | 0.99-1.03  | 0.596 |
| AST                   | 1.00 | 0.99-1.01  | 0.670 |
| Platelet count        | 0.99 | 0.98-1.00  | 0.180 |
| INR                   | 2.35 | 0.39-17.78 | 0.365 |
| Bilirubin             | 1.01 | 0.92-1.10  | 0.841 |
| MELD                  | 1.04 | 0.91-1.20  | 0.585 |
| ABIC                  | 0.73 | 0.36-1.39  | 0.355 |
| Maddrey's DF          | 0.99 | 0.97-1.01  | 0.255 |

| <b>Aggregation substance (EF0485)</b>     |       |                   |              |
|-------------------------------------------|-------|-------------------|--------------|
| Infections                                | 1.32  | 0.37-6.53         | 0.674        |
| 90 day mortality rate                     | 0.76  | 0.22-2.52         | 0.635        |
| ALT                                       | 1.01  | 0.99-1.03         | 0.596        |
| AST                                       | 1.00  | 0.99-1.01         | 0.670        |
| Platelet count                            | 0.99  | 0.98-1.00         | 0.180        |
| INR                                       | 2.35  | 0.39-17.78        | 0.365        |
| Bilirubin                                 | 1.01  | 0.92-1.10         | 0.841        |
| MELD                                      | 1.04  | 0.91-1.20         | 0.585        |
| ABIC                                      | 0.73  | 0.36-1.39         | 0.355        |
| Maddrey's DF                              | 0.99  | 0.97-1.01         | 0.255        |
| <b>Aggregation substance (prgB/asc10)</b> |       |                   |              |
| Infections                                | 0.01  | 2.53e-06-2.16e+01 | 0.308        |
| 90 day mortality rate                     | 42.29 | 1.98e-04-1.43e+05 | 1.000        |
| ALT                                       | 0.99  | 0.96-1.01         | 0.602        |
| AST                                       | 1.00  | 0.98-1.01         | 0.539        |
| Platelet count                            | 1.00  | 0.98-1.01         | 0.425        |
| INR                                       | 14.99 | 1.47-357.43       | <b>0.046</b> |
| Bilirubin                                 | 0.96  | 0.85-1.06         | 0.443        |
| MELD                                      | 1.03  | 0.89-1.19         | 0.692        |
| ABIC                                      | 1.28  | 0.64-2.71         | 0.490        |
| Maddrey's DF                              | 1.00  | 0.99-1.02         | 0.570        |
| <b>Erythromycin resistance (ermB)</b>     |       |                   |              |
| Infections                                | 0.55  | 0.13-2.90         | 0.413        |
| 90 day mortality rate                     | 0.76  | 0.22-2.52         | 0.635        |
| ALT                                       | 0.99  | 0.95-1.01         | 0.477        |
| AST                                       | 1.00  | 0.98-1.01         | 0.430        |
| Platelet count                            | 1.00  | 0.99-1.01         | 0.365        |
| INR                                       | 0.64  | 0.07-5.08         | 0.673        |
| Bilirubin                                 | 1.02  | 0.93-1.13         | 0.617        |
| MELD                                      | 1.08  | 0.93-1.28         | 0.309        |
| ABIC                                      | 1.02  | 0.48-2.13         | 0.963        |
| Maddrey's DF                              | 1.00  | 0.98-1.02         | 0.834        |
| <b>Tetracycline resistance (tetM)</b>     |       |                   |              |
| Infections                                | 1.00  | 0.28-4.96         | 1.000        |
| 90 day mortality rate                     | 33.79 | 1.12e-04-1.14e+05 | 1.000        |
| ALT                                       | 0.99  | 0.95-1.01         | 0.306        |
| AST                                       | 1.00  | 0.99-1.01         | 0.918        |
| Platelet count                            | 1.00  | 0.99-1.01         | 0.883        |
| INR                                       | 1.31  | 0.21-8.66         | 0.770        |
| Bilirubin                                 | 1.07  | 0.98-1.18         | 0.177        |
| MELD                                      | 1.18  | 1.01-1.46         | 0.065        |
| ABIC                                      | 1.35  | 0.71-2.75         | 0.368        |
| Maddrey's DF                              | 1.00  | 0.98-1.01         | 0.876        |

\*Significance is indicated in bold.

P values from Univariate logistic regression were determined by two-sided Wald test.

OR, odds ratio; CI, confidence interval; ALT, alanine aminotransferase; AST, aspartate aminotransferase; INR, international normalized ratio; MELD, model for end-stage liver disease; ABIC, Age, serum bilirubin, INR, and serum creatinine score; DF, discriminant function

**Supplementary Table 5:** Univariate linear regression analysis of laboratory and clinical parameters associated with the total amount of fecal *E. faecalis*, and Cox regression analysis assessing the association between total amount of *E. faecalis* and survival in alcoholic hepatitis patients (n=82)

| <b>Univariate linear regression</b> | <b>Coefficient</b> | <b>SE</b> | <b>R<sup>2</sup></b> | <b>P value*</b> |
|-------------------------------------|--------------------|-----------|----------------------|-----------------|
| Steroids                            | -0.222             | 0.769     | 0.001                | 0.770           |
| PTX                                 | -0.785             | 1.332     | 0.005                | 0.560           |
| Antibiotics                         | 0.022              | 0.745     | 0.000                | 0.980           |
| Infections                          | 0.002              | 1.002     | 0.000                | 1.000           |
| Cirrhosis                           | 0.031              | 0.967     | 0.000                | 0.974           |
| Abstinence day 30 follow-up         | 0.936              | 1.325     | 0.011                | 0.483           |
| Creatinine                          | -0.364             | 0.298     | 0.018                | 0.230           |
| GGT                                 | -0.000             | 0.001     | 0.010                | 0.532           |
| INR                                 | -0.122             | 0.614     | 0.000                | 0.843           |
| Platelet count                      | -0.003             | 0.004     | 0.006                | 0.500           |
| MELD                                | -0.035             | 0.057     | 0.005                | 0.547           |
| MELDNa                              | -0.051             | 0.066     | 0.008                | 0.442           |
| Maddrey's DF > 32                   | -1.610             | 1.290     | 0.024                | 0.219           |
| Maddrey's DF                        | 0.004              | 0.008     | 0.004                | 0.602           |
| ABIC                                | -0.250             | 0.286     | 0.009                | 0.386           |

  

| <b>Univariate Cox regression</b> | <b>HR</b> | <b>95% CI</b> | <b>P value*</b> |
|----------------------------------|-----------|---------------|-----------------|
| 30 day mortality                 | 0.95      | 0.76-1.18     | 0.648           |
| 90 day mortality                 | 0.91      | 0.76-1.09     | 0.296           |
| 180 day mortality                | 1.03      | 0.91-1.17     | 0.618           |

\*Significance is indicated in bold.

Antibiotics include prophylactic antibiotics. The total amount of fecal *E. faecalis* was log-transformed. In the univariate Cox regression, patients were censored at the time point they were last seen alive. *P* values were determined by two-sided Wald test.

Coefficient = non-standardized regression coefficient; SE, standard error; R<sup>2</sup> = coefficient of determination; HR, hazard ratio; CI, confidence interval; PTX, pentoxifylline; GGT, gamma-glutamyl transferase; INR, international normalized ratio; MELD, model for end-stage liver disease; MELDNa, sodium MELD; DF, discriminant function; ABIC, Age, serum bilirubin, INR, and serum creatinine score



**Supplementary Table 6:** Univariate logistic regression analysis of laboratory and clinical parameters associated with *E. faecalis* positivity, and Cox regression analysis assessing the association between *E. faecalis* positivity and survival in alcoholic hepatitis patients (n=82)

| <b>Univariate logistic regression</b> | <b>OR</b> | <b>95% CI</b> | <b>P value*</b> |
|---------------------------------------|-----------|---------------|-----------------|
| Steroids                              | 1.25      | 0.39-4.40     | 0.712           |
| PTX                                   | 1.41      | 0.21-27.97    | 0.760           |
| Antibiotics                           | 3.41      | 1.05-13.36    | 0.053           |
| Infections                            | 0.95      | 0.24-4.76     | 0.946           |
| Cirrhosis                             | 2.50      | 0.63-10.34    | 0.191           |
| Abstinence day 30 follow-up           | 3.43      | 0.57-19.33    | 0.157           |
| Creatinine                            | 1.07      | 0.70-2.15     | 0.790           |
| GGT                                   | 1.00      | 1.00-1.00     | <b>0.011</b>    |
| INR                                   | 7.20      | 1.66-45.63    | <b>0.019</b>    |
| Platelet count                        | 0.99      | 0.99-1.00     | 0.050           |
| MELD                                  | 1.09      | 0.98-1.22     | 0.129           |
| MELDNa                                | 1.12      | 1.00-1.29     | 0.066           |
| Maddrey's DF > 32                     | 2.50      | 0.32-14.77    | 0.326           |
| Maddrey's DF                          | 1.00      | 0.99-1.02     | 0.525           |
| ABIC                                  | 1.16      | 0.75-1.82     | 0.517           |

  

| <b>Univariate Cox regression</b> | <b>HR</b> | <b>95% CI</b> | <b>P value*</b> |
|----------------------------------|-----------|---------------|-----------------|
| 30 day mortality                 | 1.59      | 0.20-12.96    | 0.663           |
| 90 day mortality                 | 3.10      | 0.40-23.68    | 0.276           |
| 180 day mortality                | 5.96      | 0.79-44.88    | 0.083           |

\*Significance is indicated in bold.

Antibiotics include prophylactic antibiotics. In the univariate Cox regression, patients were censored at the time point they were last seen alive. *P* values were determined by two-sided Wald test.

OR, odds ratio; HR, hazard ratio; CI, confidence interval; PTX, pentoxifylline; GGT, gamma-glutamyl transferase; INR, international normalized ratio; MELD, model for end-stage liver disease; MELDNa, sodium MELD; DF, discriminant function; ABIC, Age, serum bilirubin, INR, and serum creatinine score

**Supplementary Table 7: Region/center specific clinical characteristics of patients with alcoholic hepatitis (n=88)**

| Variables                                 | France (n=17)      | Mexico (n=6)       | Spain (n=7)          | UK (n=11)           | USA East (n=17)      | USA Midwest (n=14)   | USA West (n=16)        | P value*        |
|-------------------------------------------|--------------------|--------------------|----------------------|---------------------|----------------------|----------------------|------------------------|-----------------|
| Sex (% male), n=88                        | 13 (76.5)          | 5 (83.3)           | 6 (85.7)             | 5 (45.5)            | 7 (41.2)             | 8 (57.1)             | 16 (100.0)             | <b>0.002</b>    |
| Age (years), n=88                         | 55.0 (30.0-75.0)   | 37.0 (35.0-48.0)   | 55.0(48.0-61.0)      | 48.0 (40.0-64.0)    | 48.0 (32.0-63.0)     | 50.5 (36.0-66.0)     | 58.0 (31.0-69.0)       | 0.054           |
| BMI (kg/m <sup>2</sup> ), n=62            | 23.1 (16.3-31.9)   | 25.5 (19.5-27.8)   | 24.9 (24.9-24.9)     | 25.2 (19.1-48.3)    | 29.6 (20.4-39.1)     | 28.5 (16.4-41.7)     | 28.5 (21.1-40.8)       | 0.309           |
| Creatinine (mg/dL), n=88                  | 0.9 (0.4-5.6)      | 0.9 (0.6-3.3)      | 0.8 (0.6-1.0)        | 0.7 (0.3-2.0)       | 0.8 (0.4-8.1)        | 0.9 (0.5-3.1)        | 0.7 (0.5-5.5)          | 0.914           |
| Bilirubin (mg/dL), n=88                   | 20.1 ( 5.2-30.9)   | 9.7 (3.1-22.3)     | 10.5 (3.1-21.4)      | 15.5 (4.9-36.6)     | 18.3 (4.3-38.6)      | 17.8 (8.4-32.1)      | 8.1 (2.5-31.6)         | <b>0.014</b>    |
| AST (IU/L), n=88                          | 102.0 (67.0-406.0) | 139.5 (56.0-170.0) | 159.0 (105.0-290.0)  | 117.0 (63.0-170.0)  | 205.0 (38.0-339.0)   | 197.5 (51.0-456.0)   | 144.5 (57.0-274.0)     | <b>0.018</b>    |
| ALT (IU/L), n=88                          | 34.0 (20.0-120.0)  | 52.0 (26.0-174.0)  | 61.0 (30.0-216.0)    | 33.0 (21.0-75.0)    | 48.0 (15.0-118.0)    | 60.5 (19.0-134.0)    | 44.0 (25.0-124.0)      | 0.172           |
| Albumin (g/dL), n=84                      | 2.9 (2.2-4.1)      | 1.8 (1.3-2.7)      | 2.2 (1.9-3.4)        | 2.7 (2.1-3.3)       | 2.7 (1.8-3.9)        | 2.1 (1.6-3.2)        | 2.3 (1.5-3.2)          | <b>2.89e-04</b> |
| INR, n=87                                 | 1.7 (1.4-3.5)      | 2.2 (1.7-2.7)      | 1.2 (1.0-2.1)        | 2.1 (1.6-2.6)       | 1.8 (1.3-4.4)        | 1.6 (1.2-2.3)        | 1.9 (1.1-3.7)          | 0.064           |
| GGT (IU/L), n=45                          | 115.0 (33.0-783.0) | 109.5 (88.0-131.0) | 2615.0 (88.0-3632.0) | 242.0 (120.0-917.0) | 536.5 (135.0-2660.0) | 698.0 (288.0-1519.0) | 2116.0 (2116.0-2116.0) | <b>0.011</b>    |
| Platelet count (10 <sup>9</sup> /L), n=84 | 126.0 (21.0-295.0) | 73.0 (32.0-326.0)  | 134.0 (42.0-194.0)   | 128.0 (51.0-189.0)  | 153.0 (22.0-333.0)   | 115.0 (13.0-447.0)   | 103.0 (49.0-414.0)     | 0.842           |
| Steroids, n (%)                           | 5 (29.4)           | 2 (40.0)           | 2 (28.6)             | 4 (36.4)            | 6 (37.5)             | 9 (64.3)             | 2 (12.5)               | 0.147           |
| Antibiotics n (%)                         | 6 (35.3)           | 4 (80.0)           | 3 (42.9)             | 8 (72.7)            | 7 (43.8)             | 4 (28.6)             | 9 (56.3)               | 0.204           |
| Infections, n (%)                         | 7 (46.7)           | 0 (0.0)            | 1 (16.7)             | 2 (22.2)            | 1 (7.7)              | 3 (21.4)             | 3 (23.1)               | 0.391           |
| MELD, median (range), n=87                | 23.0 (19.0-46.0)   | 26.5 (16.0-33.0)   | 18.0 (12.0-26.0)     | 24.0 (19.0-29.0)    | 26.0 (15.0-40.0)     | 23.0 (19.0-34.0)     | 22.5 (13.0-40.0)       | 0.087           |
| MELD > 21, n (%)                          | 15 (88.2)          | 5 (83.3)           | 3 (42.9)             | 9 (81.8)            | 13 (76.5)            | 9 (69.2)             | 9 (56.2)               | 0.234           |
| Maddrey's DF, median (range), n=72        | 90.1 (39.7-234.4)  | 66.1 (25.6-99.1)   | 15.2 (-8.4-69.1)     | 54.7 (33.0-140.4)   | 54.7 (8.0-140.3)     | 117.6 (35.1-200.1)   | 42.5 (-0.6-145.4)      | <b>0.001</b>    |
| Maddrey's DF > 32, n (%)                  | 15 (100.0)         | 5 (83.3)           | 3 (42.9)             | 11 (100.0)          | 13 (76.5)            | 2 (100.0)            | 9 (64.3)               | <b>0.008</b>    |
| ABIC, median (range), n=87                | 8.3 (6.0-11.0)     | 6.6 (6.5-9.0)      | 7.5 (6.6-9.3)        | 8.3 (6.7-9.6)       | 8.3 (5.6-10.5)       | 7.8 (5.9-9.8)        | 8.5 (5.7-10.4)         | 0.225           |
| Liver cirrhosis, n (%)                    | 11 (68.8)          | 2 (66.7)           | 3 (50.0)             | 1 (50.0)            | 5 (41.7)             | 4 (100.0)            | 7 (87.5)               | 0.276           |
| 30 day mortality rate, n (%)              | 2 (11.8)           | 1 (20.0)           | 1 (14.3)             | 1 (9.1)             | 1 (9.1)              | 2 (14.3)             | 1 (6.2)                | 0.963           |
| 90 day mortality rate, n (%)              | 4 (28.6)           | 1 (25.0)           | 1 (25.0)             | 3 (50.0)            | 1 (12.5)             | 3 (23.1)             | 2 (18.2)               | 0.827           |

\*Significance is indicated in bold.

Antibiotics include prophylactic antibiotics. Values are presented as median with range in brackets for continuous variables or number and percentage in brackets for categorical variables. Percentages are calculated based on the actual number of patients in each group where the respective data was available. The number of subjects for which the respective data was available is indicated in the first column. Kruskal-Wallis test and two-sided Fisher's exact test were used to determine *P* values for continuous and categorical variables, respectively.

UK, United Kingdom; USA, United States of America; BMI, body mass index; AST, aspartate aminotransferase; ALT, alanine aminotransferase; INR, international normalized ratio; GGT, gamma-glutamyl transferase; MELD, model for end-stage liver disease; DF, discriminant function; ABIC, Age, serum bilirubin, INR, and serum creatinine score

**Supplementary Table 8:** Characteristics of donor patients for fecal transplantation of germ-free mice

| <b>Patient</b>           | <b>#1</b> | <b>#2</b>      | <b>#3</b> | <b>#4</b>   | <b>#5</b> | <b>#6</b> | <b>#7</b>   |
|--------------------------|-----------|----------------|-----------|-------------|-----------|-----------|-------------|
| Cytolysin                | Positive  | Positive       | Negative  | Negative    | Positive  | Negative  | Negative    |
| Age (years)              | 35        | 41             | 51        | 39          | 61        | 53        | 69          |
| Gender                   | Male      | Male           | Male      | Female      | Male      | Male      | Male        |
| BMI (kg/m <sup>2</sup> ) | 27.5      | 41.7           | N/A       | 39.1        | 23.8      | N/A       | 40.8        |
| Center                   | Mexico    | USA<br>Midwest | Spain     | USA<br>East | France    | Spain     | USA<br>West |
| Infection                | N/A       | No             | No        | Yes         | No        | No        | No          |
| Antibiotics              | Yes       | No             | No        | Yes         | No        | No        | No          |
| Steroids                 | Yes       | Yes            | No        | No          | No        | No        | No          |
| Pentoxifylline           | Yes       | No             | No        | No          | No        | No        | Yes         |
| Stage of fibrosis        | 4         | N/A            | N/A       | N/A         | 4         | 0         | 4           |
| Died within 180 days     | Yes       | Yes            | No        | No          | Yes       | No        | No          |
| MELD                     | 33        | 29             | 13        | 15          | 22        | 14        | 18          |

Antibiotics include prophylactic antibiotics.

BMI, body mass index; MELD, model for end-stage liver disease; N/A, not applicable

**Supplementary Table 9:** All primers used in this study

| Gene                                       | Primer | Sequence                                 |
|--------------------------------------------|--------|------------------------------------------|
| 16S rRNA (total bacteria)                  | F      | 5'-GTGSTGCAYGGYTGTTCGTCA-3'              |
|                                            | R      | 5'-ACGTCRTCCMCACCTTCCTC-3'               |
| <i>E. faecalis</i> 16S rRNA                | F      | 5'-CGCTTCTTTCCTCCCGAGT-3'                |
|                                            | R      | 5'-GCCATGCGGCATAAACTG-3'                 |
| <i>E. faecalis</i> <i>cylL<sub>L</sub></i> | F      | 5'-CTGTTGCGGCGACAGCT-3'                  |
|                                            | R      | 5'-CCACCAACCCAGCCACAA-3'                 |
| <i>E. faecalis</i> <i>cylL<sub>S</sub></i> | F      | 5'-GTAAAATAAGTAAAATCAAGAAAACCTATTACTC-3' |
|                                            | R      | 5'-CAAAGAAGGACCAACAAGTTCTAATT-3'         |
| Mouse 18S                                  | F      | 5'-AGTCCCTGCCCTTTGTACACA-3'              |
|                                            | R      | 5'-CGATCCCAGGGCCTCACTA-3'                |
| Mouse <i>Acta2</i>                         | F      | 5'-GTTCAGTGGTGCCTCTGTCA-3'               |
|                                            | R      | 5'-ACTGGGACGACATGGAAAAG-3'               |
| Mouse <i>Adh1</i>                          | F      | 5'-GGGTTCTCAACTGGCTATGG-3'               |
|                                            | R      | 5'-ACAGACAGACCGACACCTCC-3'               |
| Mouse <i>Col1a1</i>                        | F      | 5'-TAGGCCATTGTGTATGCAGC-3'               |
|                                            | R      | 5'-ACATGTTTCAGCTTTGTGGACC-3'             |
| Mouse <i>Cxcl1</i>                         | F      | 5'-TGCACCCAAACCGAAGTC-3'                 |
|                                            | R      | 5'-GTCAGAAGCCAGCGTTCACC-3'               |
| Mouse <i>Cxcl2</i>                         | F      | 5'-AAAGTTTGCCTTGACCCTGAA-3'              |
|                                            | R      | 5'-CTCAGACAGCGAGGCACATC-3'               |
| Mouse <i>Cyp2e1</i>                        | F      | 5'-CTTAGGGAAAACCTCCGCAC-3'               |
|                                            | R      | 5'-GGGACATTCCTGTGTTCCAG-3'               |
| Mouse <i>Il1b</i>                          | F      | 5'-GGTCAAAGGTTTGGAAAGCAG-3'              |
|                                            | R      | 5'-TGTGAAATGCCACCTTTTGA-3'               |
